# Supplementary material
Source: publisher figshare collection journal article supplement (https://acs.figshare.com/ndownloader/files/4544686)
Supplement: Supplementary file 1 [file 4544686]

- 1     **Supporting Information for**
- 2     **“Dietary intake and human milk residues of hexachlorocyclohexane isomers in two Chinese cities”**
- 3     *Yanxin Yu, Shu Tao, Wenxin Liu, Xiaoxia Lu, Xuejun Wang, Ming H Wong*
- 4     This material includes 10 pages, 9 tables and 1 figure.

***Characteristics of the subjects.*** The characteristics of the mothers who donated their breast milk are listed in Table S1 and S2. There were a total of 76 lactating women among which 40 from Beijing and 36 from Shenyang. The parameters listed include age, body weight and height, body mass index (BMI, weight/height<sup>2</sup>), place of residence (rural or urban), occupation, the number of children breastfed and human milk sampling time (number of the days from the first breastfeeding to the sampling). Infant's birth weights are also listed. The parameters collected but not listed are migration history, years living in the cities, smoking, drinking, disease and exercise, spouse's age and occupation, etc. No significant influences were found by unlisted parameters on human milk HCH levels.

**Table S1.** Descriptive characteristics of the human milk donors from Beijing.

| No. | Age | Height | Weight | BMI               | Child birth weight | Residence | Occupation     | No of Children | period between childbirth and sampling |
|-----|-----|--------|--------|-------------------|--------------------|-----------|----------------|----------------|----------------------------------------|
|     |     | cm     | kg     | kg/m <sup>2</sup> | g                  |           |                |                | day                                    |
| 1   | 23  | 160    | 70     | 27.3              | 3050               | rural     | vendor         | 1              | 2                                      |
| 2   | 27  | 160    | 67.5   | 26.4              | 3400               | urban     | vendor         | 2              | 20                                     |
| 3   | 25  | 155    | 64     | 26.6              | 2700               | urban     | tailor         | 1              | 2                                      |
| 4   | 29  | 159    | 75     | 29.7              | 3350               | urban     | childcare      | 1              | 75                                     |
| 5   | 34  | 160    | 88     | 34.4              | 3100               | urban     | teacher        | 1              | 14                                     |
| 6   | 29  | 152    | 72.5   | 31.4              | 3300               | urban     | secretary      | 1              | 15                                     |
| 7   | 36  | 158    | 82     | 32.8              | 3400               | urban     | housewife      | 2              | 3                                      |
| 8   | 31  | 160    | 62     | 24.2              | 3150               | urban     | vendor         | 2              | 45                                     |
| 9   | 25  | 173    | 85     | 28.4              | 4300               | urban     | accountant     | 1              | 4                                      |
| 10  | 28  | 168    | 70     | 24.8              | 3350               | urban     | sells men      | 2              | 5                                      |
| 11  | 26  | 151    | 67     | 29.4              | 3750               | urban     | housewife      | 1              | 3                                      |
| 12  | 33  | 163    | 65     | 24.5              | 3400               | urban     | tailor         | 2              | 1                                      |
| 13  | 26  | 162    | 75     | 28.6              | 3600               | urban     | vendor         | 1              | 10                                     |
| 14  | 27  | 160    | 86.5   | 33.8              | 3600               | urban     | vendor         | 2              | not available                          |
| 15  | 27  | 172    | 71     | 24.0              | 2950               | rural     | worker         | 1              | 5                                      |
| 16  | 36  | 156    | 64     | 26.3              | 2800               | urban     | electrician    | 1              | 7                                      |
| 17  | 30  | 155    | 82.5   | 34.3              | 3150               | urban     | nurse          | 1              | 12                                     |
| 18  | 24  | 163    | 60     | 22.6              | 3600               | rural     | vendor         | 1              | 4                                      |
| 19  | 33  | 158    | 65     | 26.0              | 3650               | urban     | shopkeeper     | 2              | 4                                      |
| 20  | 31  | 165    | 66     | 24.2              | 3400               | urban     | sells men      | 1              | 6                                      |
| 21  | 23  | 167    | 72     | 25.8              | 3150               | rural     | vendor         | 1              | 8                                      |
| 22  | 28  | 162    | 60     | 22.9              | 3300               | urban     | office worker  | 1              | 2                                      |
| 23  | 28  | 170    | 71     | 24.6              | 4050               | urban     | office worker  | 1              | 7                                      |
| 24  | 23  | 159    | 64     | 25.3              | 3000               | rural     | farmer         | 1              | 2                                      |
| 25  | 27  | 165    | 80     | 29.4              | 3800               | rural     | worker         | 1              | 11                                     |
| 26  | 33  | 166    | 58     | 21.0              | 2600               | rural     | vendor         | 2              | 3                                      |
| 27  | 27  | 155    | 70     | 29.1              | 3150               | urban     | nurse          | 1              | 10                                     |
| 28  | 33  | 165    | 70     | 25.7              | 3600               | urban     | vendor         | 2              | 3                                      |
| 29  | 28  | 162    | 73     | 27.8              | 3300               | urban     | subway driver  | 1              | 6                                      |
| 30  | 27  | 168    | 85     | 30.1              | 3500               | urban     | sells men      | 1              | 3                                      |
| 31  | 24  | 170    | 84     | 29.1              | 3950               | urban     | vendor         | 1              | 5                                      |
| 32  | 28  | 157    | 72.5   | 29.4              | 2700               | urban     | office worker  | 1              | 12                                     |
| 33  | 28  | 168    | 86.5   | 30.7              | 3900               | urban     | housewife      | 1              | 12                                     |
| 34  | 33  | 163    | 94.5   | 35.6              | 3050               | urban     | cooker         | 1              | 12                                     |
| 35  | 28  | 168    | 83     | 29.4              | 4350               | rural     | vendor         | 2              | 26                                     |
| 36  | 25  | 168    | 75     | 26.6              | 3700               | urban     | hotel clerk    | 1              | 2                                      |
| 37  | 33  | 153    | 66     | 28.2              | 3950               | urban     | vendor         | 2              | 10                                     |
| 38  | 31  | 160    | 65     | 25.4              | 3350               | urban     | hotel clerk    | 1              | 4                                      |
| 39  | 34  | 156    | 66     | 27.1              | 3000               | urban     | shop assistant | 2              | 13                                     |
| 40  | 28  | 160    | 58     | 22.7              | 3000               | rural     | tailor         | 2              | 3                                      |

**Table S2.** Descriptive characteristics of the human milk donors from Shenyang.

| No. | Age | Height | Weight | BMI               | Child birth weight | Residence | Occupation    | No of Children | Period between childbirth and sampling |
|-----|-----|--------|--------|-------------------|--------------------|-----------|---------------|----------------|----------------------------------------|
|     |     | cm     | kg     | kg/m <sup>2</sup> | g                  |           |               |                | day                                    |
| 1   | 29  | 158    | 88     | 35.1              | 3200               | urban     | teacher       | 1              | 13                                     |
| 2   | 25  | 163    | 76     | 28.6              | 4100               | urban     | accountant    | 1              | 2                                      |
| 3   | 30  | 168    | 84     | 29.8              | 3450               | urban     | office worker | 1              | 2                                      |
| 4   | 24  | 160    | 55     | 21.5              | 2850               | urban     | housewife     | 1              | 20                                     |
| 5   | 29  | 161    | 70     | 27.0              | 3350               | urban     | secretary     | 1              | 3                                      |
| 6   | 28  | 158    | 72     | 28.8              | 3600               | urban     | office worker | 1              | 22                                     |
| 7   | 22  | 162    | 81     | 30.9              | 3700               | urban     | not available | 1              | 13                                     |
| 8   | 26  | 162    | 74     | 28.2              | 3750               | urban     | office worker | 1              | 7                                      |
| 9   | 27  | 164    | 88.5   | 30.7              | 3150               | urban     | not available | 1              | 13                                     |
| 10  | 25  | 165    | 91.5   | 33.6              | 3800               | urban     | not available | 1              | 13                                     |
| 11  | 32  | 160    | 75     | 29.3              | 3050               | urban     | office worker | 1              | 18                                     |
| 12  | 29  | 158    | 70     | 28.0              | 3400               | urban     | sells men     | 1              | 4                                      |
| 13  | 25  | 161    | 65     | 25.1              | 3600               | urban     | secretary     | 1              | 2                                      |
| 14  | 25  | 161    | 88     | 33.9              | 3600               | urban     | not available | 1              | 13                                     |
| 15  | 30  | 162    | 81.5   | 31.1              | 3000               | urban     | hotel clerk   | 1              | 10                                     |
| 16  | 32  | 168    | 91     | 32.2              | 3750               | rural     | not available | 1              | 13                                     |
| 17  | 31  | 170    | 89.5   | 31.0              | 3457               | urban     | free lance    | 1              | 13                                     |
| 18  | 22  | 162    | 73.5   | 28.0              | 3700               | urban     | office worker | 1              | 2                                      |
| 19  | 21  | 154    | 80     | 34.0              | 3650               | rural     | vendor        | 1              | 15                                     |
| 20  | 25  | 165    | 90     | 33.1              | 3500               | urban     | free lance    | 1              | 5                                      |
| 21  | 29  | 164    | 71.5   | 26.6              | 4000               | urban     | office worker | 1              | 10                                     |
| 22  | 28  | 158    | 65.5   | 26.2              | 3300               | urban     | worker        | 1              | 9                                      |
| 23  | 26  | 163    | 72.5   | 27.3              | 3200               | urban     | manager       | 1              | 13                                     |
| 24  | 28  | 162    | 86.5   | 33.0              | 3200               | urban     | not available | 1              | 13                                     |
| 25  | 24  | 170    | 90     | 31.1              | 3000               | urban     | nurse         | 1              | 10                                     |
| 26  | 24  | 160    | 69     | 27.0              | 3200               | urban     | housewife     | 1              | 7                                      |
| 27  | 24  | 168    | 64     | 22.7              | 3300               | urban     | office worker | 1              | 17                                     |
| 28  | 35  | 162    | 82     | 31.2              | 3457               | rural     | farmer        | 2              | 13                                     |
| 29  | 31  | 160    | 73     | 28.5              | 3800               | urban     | vendor        | 1              | 10                                     |
| 30  | 27  | 162    | 86     | 32.8              | 3000               | urban     | not available | 1              | 13                                     |
| 31  | 30  | 160    | 77.5   | 30.3              | 4400               | urban     | secretary     | 1              | 22                                     |
| 32  | 39  | 164    | 80     | 29.7              | 3000               | urban     | office worker | 1              | 14                                     |
| 33  | 29  | 168    | 84     | 29.8              | 3750               | urban     | worker        | 1              | 5                                      |
| 34  | 25  | 158    | 69.5   | 27.8              | 3800               | urban     | not available | 1              | 13                                     |
| 35  | 25  | 168    | 74     | 26.2              | 3000               | urban     | secretary     | 1              | 14                                     |
| 36  | 29  | 155    | 89     | 37.0              | 3400               | urban     | worker        | 1              | 13                                     |

**Food consumption.** The average body weight adjusted consumptions of major foodstuffs in fresh weight per person per day are presented in Table S3 by the two studied groups from Beijing and Shenyang, respectively. The consumption data was derived by multiplying the frequency of consumption of each food item by the portion weight of that food, both provided by the breast milk donors. These food items were selected based on the dietary pattern of Chinese population ([1](#)). The questionnaires were standardized but were not able to be validated.

**Table S3.** Average per capita daily consumptions per body weight of major foods by the two groups as means and standard deviations, g (f.w.) /d. kg (body weight)

| City     | Apple     | Banana    | Pear      | Grape      | Orange     | Wheat       | Rice       |
|----------|-----------|-----------|-----------|------------|------------|-------------|------------|
| Beijing  | 2.5 ± 2.3 | 1.3 ± 1.2 | 1.7 ± 1.9 | 0.97 ± 1.1 | 0.96 ± 1.2 | 0.74 ± 0.45 | 2.1 ± 0.88 |
| Shenyang | 1.5 ± 1.1 | 1.1 ± 1.4 | 1.1 ± 1.0 | 0.85 ± 1.1 | 0.97 ± 1.0 | 0.61 ± 0.32 | 2.3 ± 1.1  |

| City     | Chinese cabbage | Cabbage     | Spinach     | Cucumber    | Carrot      | Green pepper | Eggplant    | Lettuce     | Potato      | Bean        |
|----------|-----------------|-------------|-------------|-------------|-------------|--------------|-------------|-------------|-------------|-------------|
| Beijing  | 0.80 ± 0.94     | 0.46 ± 0.68 | 1.0 ± 1.4   | 0.81 ± 1.3  | 0.68 ± 0.82 | 0.48 ± 0.69  | 0.67 ± 1.1  | 0.38 ± 0.63 | 1.1 ± 1.3   | 0.81 ± 1.2  |
| Shenyang | 0.88 ± 0.80     | 0.17 ± 0.30 | 0.28 ± 0.30 | 0.53 ± 0.49 | 0.35 ± 0.43 | 0.26 ± 0.34  | 0.58 ± 0.47 | 0.19 ± 0.22 | 0.78 ± 0.83 | 0.56 ± 0.46 |

| City     | Grass carp  | Crucian     | Carp        | Bighead      | Beef        | Chicken     | Mutton      | Pork        |
|----------|-------------|-------------|-------------|--------------|-------------|-------------|-------------|-------------|
| Beijing  | 0.10 ± 0.16 | 0.22 ± 0.28 | 0.11 ± 0.15 | 0.059 ± 0.12 | 0.36 ± 0.52 | 0.43 ± 0.50 | 0.23 ± 0.39 | 0.62 ± 0.60 |
| Shenyang | 0.10 ± 0.38 | 0.15 ± 0.39 | 0.06 ± 0.08 | 0.060 ± 0.18 | 0.27 ± 0.29 | 0.51 ± 0.70 | 0.22 ± 0.28 | 0.74 ± 0.60 |

| City     | Eggs        | Milk       | Oil          |
|----------|-------------|------------|--------------|
| Beijing  | 1.0 ± 0.71  | 2.7 ± 2.5  | 0.24 ± 0.029 |
| Shenyang | 0.73 ± 0.43 | 1.1 ± 0.97 | 0.22 ± 0.027 |

**Detection limits and recoveries.** The detection limits for HCHs in various categories of samples are tabulated in Table S4 and the average recoveries of the determination procedure for various foodstuffs based on standard spiking are listed in Table S5. Zeros were assigned to those below the detection limits for calculation of means and standard deviations. For the geometric means, those below the detection limits were omitted.

**Table S4.** Detection limits for various categories of samples, ng/g (f.w.).

| Sample                    | $\alpha$ -HCH | $\beta$ -HCH | $\gamma$ -HCH | $\delta$ -HCH |
|---------------------------|---------------|--------------|---------------|---------------|
| Human milk, milk and eggs | 0.013         | 0.027        | 0.046         | 0.015         |
| Vegetables and fruits     | 0.002         | 0.004        | 0.006         | 0.002         |
| Cereals                   | 0.007         | 0.015        | 0.027         | 0.008         |
| Fish and meat             | 0.005         | 0.012        | 0.019         | 0.007         |

**Table S5.** Recoveries for various samples based on the spiked sample measurement as Mean $\pm$ S.D.(range) %.

| Sample                         | $\alpha$ -HCH         | $\beta$ -HCH         | $\gamma$ -HCH         | $\delta$ -HCH        |
|--------------------------------|-----------------------|----------------------|-----------------------|----------------------|
| Human milk, milk and eggs      | 87 $\pm$ 3 (84-88)    | 88 $\pm$ 4 (84-91)   | 86 $\pm$ 4 (82-89)    | 88 $\pm$ 2 (85-90)   |
| Vegetables, fruits and cereals | 85 $\pm$ 5 (78-89)    | 89 $\pm$ 6 (82-93)   | 81 $\pm$ 4 (76-84)    | 87 $\pm$ 6 (79-90)   |
| Fish and meat                  | 105 $\pm$ 16 (86-119) | 103 $\pm$ 7 (99-111) | 102 $\pm$ 18 (81-113) | 89 $\pm$ 16 (71-102) |

**Food concentrations.** The measured concentrations of HCHs in foodstuffs are listed in Table S6 (Beijing) and S7 (Shenyang) for the two cities, respectively. Relatively high concentrations of HCHs were found in flour samples from Shenyang. The flour in the market of Shenyang was imported from Shandong and Henan, while those in the market of Beijing were from Henan and local producers. The measured concentrations of HCHs from Shandong were several times higher than those from other places and further effort is needed to investigate their sources.

**Table S6.** Concentrations of HCHs in various foodstuffs from Beijing as means and standard deviations as ng/ml for milk and oil and ng/g (f.w.) for the other samples.

| Category   | Food            | Sample size | $\alpha$ -HCH     | $\beta$ -HCH      | $\gamma$ -HCH     | $\delta$ -HCH     |
|------------|-----------------|-------------|-------------------|-------------------|-------------------|-------------------|
| Fruits     | apple           | 2           | $0.070 \pm 0.003$ | $0.073 \pm 0.002$ | $0.073 \pm 0.004$ | $0.017 \pm 0.001$ |
|            | banana          | 1           | 0.005             | N.D               | 0.005             | 0.004             |
|            | pear            | 1           | 0.232             | 0.061             | 0.062             | 0.022             |
|            | grape           | 1           | 0.087             | 0.110             | 0.108             | 0.048             |
|            | orange          | 1           | 0.006             | 0.010             | 0.031             | N.D               |
| Vegetables | Chinese cabbage | 4           | $0.011 \pm 0.002$ | $0.012 \pm 0.013$ | $0.040 \pm 0.037$ | 0.001             |
|            | cabbage         | 2           | $0.011 \pm 0.016$ | ND                | ND                | ND                |
|            | spinach         | 2           | $0.017 \pm 0.001$ | $0.022 \pm 0.007$ | $0.118 \pm 0.103$ | $0.012 \pm 0.003$ |
|            | cucumber        | 2           | 0.036             | $0.016 \pm 0.002$ | 0.587             | 0.032             |
|            | carrot          | 2           | $0.021 \pm 0.008$ | $0.192 \pm 0.013$ | $0.072 \pm 0.019$ | $0.005 \pm 0.007$ |
|            | green pepper    | 2           | 0.013             | $0.014 \pm 0.001$ | $0.063 \pm 0.003$ | $0.009 \pm 0.003$ |
|            | eggplant        | 2           | 0.034             | $0.050 \pm 0.044$ | 0.568             | 0.034             |
|            | lettuce         | 2           | $0.031 \pm 0.005$ | $0.030 \pm 0.013$ | $0.046 \pm 0.001$ | $0.013 \pm 0.005$ |
|            | potato          | 2           | $0.020 \pm 0.001$ | 0.019             | $0.034 \pm 0.005$ | $0.014 \pm 0.004$ |
|            | bean            | 3           | $0.005 \pm 0.002$ | ND                | $0.012 \pm 0.006$ | $0.003 \pm 0.001$ |
|            |                 |             |                   |                   |                   |                   |
| Cereals    | flour           | 12          | $0.263 \pm 0.076$ | $0.068 \pm 0.048$ | $0.114 \pm 0.049$ | $0.097 \pm 0.029$ |
|            | rice            | 13          | $0.027 \pm 0.008$ | $0.018 \pm 0.032$ | $0.049 \pm 0.026$ | $0.037 \pm 0.034$ |
| Fish       | grass carp      | 11          | $0.059 \pm 0.024$ | $0.108 \pm 0.072$ | $0.051 \pm 0.018$ | $0.023 \pm 0.014$ |
|            | crucian         | 11          | $0.441 \pm 0.333$ | $1.325 \pm 1.479$ | $0.250 \pm 0.265$ | $0.141 \pm 0.103$ |
|            | carp            | 10          | $0.281 \pm 0.212$ | $0.239 \pm 0.134$ | $0.094 \pm 0.046$ | $0.043 \pm 0.034$ |
|            | bighead         | 11          | $0.059 \pm 0.043$ | $0.178 \pm 0.188$ | $0.119 \pm 0.105$ | $0.078 \pm 0.135$ |
| Meat       | beef            | 2           | $0.030 \pm 0.016$ | $0.219 \pm 0.042$ | $0.051 \pm 0.007$ | 0.002             |
|            | chicken         | 5           | $0.017 \pm 0.002$ | $0.032 \pm 0.012$ | $0.031 \pm 0.004$ | 0.002             |
|            | mutton          | 2           | $0.055 \pm 0.007$ | $0.737 \pm 0.025$ | $0.092 \pm 0.051$ | 0.002             |
|            | pork            | 5           | $0.102 \pm 0.013$ | $0.529 \pm 0.098$ | $0.201 \pm 0.160$ | $0.002 \pm 0.001$ |
| Eggs       | eggs            | 6           | $0.069 \pm 0.029$ | $0.481 \pm 0.790$ | $0.119 \pm 0.142$ | $0.165 \pm 0.094$ |
| Milk       | milk            | 5           | $0.310 \pm 0.163$ | $1.341 \pm 1.111$ | $0.154 \pm 0.144$ | $0.247 \pm 0.132$ |
| Oil        | oil             | 14          | $1.495 \pm 0.930$ | $1.617 \pm 2.441$ | $2.027 \pm 0.954$ | $2.623 \pm 2.210$ |

Note: 1) ND - not detectable; 2) For those without replicates due to technical reason (lost during analysis or outliers of individual isomers), standard deviations were not available; 3) The same brands of oil from same producers (Fulinmen and Luhua) were the most popular products in the market of both cities and the samples were combined for analysis.

**Table S7.** Concentrations of HCHs in various foodstuffs from Shenyang as means and standard deviations as ng/ml for milk and oil and ng/g (f.w.) for the other samples.

| Category   | Food            | Sample size | $\alpha$ -HCH     | $\beta$ -HCH      | $\gamma$ -HCH     | $\delta$ -HCH     |
|------------|-----------------|-------------|-------------------|-------------------|-------------------|-------------------|
| Fruits     | apple           | 2           | 0.184 $\pm$ 0.053 | 0.043 $\pm$ 0.061 | 0.085 $\pm$ 0.011 | 0.043 $\pm$ 0.023 |
|            | banana          | 1           | 0.007             | N.D               | N.D               | N.D               |
|            | pear            | 1           | 0.052             | 0.052             | 0.020             | 0.015             |
|            | grape           | 1           | 0.038             | 0.108             | 0.059             | 0.087             |
|            | orange          | 1           | 0.004             | 0.000             | 0.000             | 0.004             |
| Vegetables | Chinese cabbage | 3           | 0.015 $\pm$ 0.006 | 0.155 $\pm$ 0.018 | 0.070 $\pm$ 0.006 | N.D               |
|            | cabbage         | 2           | N.D               | 0.193 $\pm$ 0.030 | 0.047 $\pm$ 0.010 | N.D               |
|            | spinach         | 1           | 0.113             | 0.921             | 0.140             | 0.054             |
|            | cucumber        | 3           | 0.039 $\pm$ 0.007 | 0.009 $\pm$ 0.002 | 0.007             | 0.008 $\pm$ 0.002 |
|            | carrot          | 3           | 0.041 $\pm$ 0.008 | 0.217 $\pm$ 0.010 | 0.027 $\pm$ 0.001 | 0.015 $\pm$ 0.001 |
|            | green pepper    | 2           | 0.041 $\pm$ 0.023 | 0.017 $\pm$ 0.004 | 0.057             | 0.051 $\pm$ 0.002 |
|            | eggplant        | 2           | 0.013 $\pm$ 0.001 | 0.067 $\pm$ 0.001 | 0.013 $\pm$ 0.001 | 0.003             |
|            | lettuce         | 2           | 0.242 $\pm$ 0.024 | 5.311 $\pm$ 0.172 | 0.171 $\pm$ 0.012 | 0.112 $\pm$ 0.007 |
|            | potato          | 2           | 0.068 $\pm$ 0.012 | 0.088 $\pm$ 0.021 | 0.037 $\pm$ 0.006 | 0.016 $\pm$ 0.001 |
|            | bean            | 2           | 0.043 $\pm$ 0.008 | 0.063 $\pm$ 0.018 | 0.023 $\pm$ 0.004 | 0.005 $\pm$ 0.001 |
|            |                 |             |                   |                   |                   |                   |
| Cereals    | flour           | 13          | 2.713 $\pm$ 2.064 | 0.194 $\pm$ 0.119 | 0.117 $\pm$ 0.030 | 0.147 $\pm$ 0.044 |
|            | rice            | 13          | 0.093 $\pm$ 0.029 | 0.043 $\pm$ 0.056 | 0.049 $\pm$ 0.026 | 0.082 $\pm$ 0.019 |
| Fish       | grass carp      | 10          | 0.248 $\pm$ 0.123 | 0.833 $\pm$ 0.407 | 0.206 $\pm$ 0.074 | 0.287 $\pm$ 0.140 |
|            | crucian         | 13          | 0.252 $\pm$ 0.034 | 1.050 $\pm$ 0.215 | 0.208 $\pm$ 0.030 | 0.190 $\pm$ 0.037 |
|            | carp            | 10          | 0.876 $\pm$ 0.405 | 5.429 $\pm$ 1.635 | 0.430 $\pm$ 0.166 | 0.756 $\pm$ 0.337 |
|            | bighead         | 9           | 0.765 $\pm$ 0.250 | 1.655 $\pm$ 0.450 | 0.424 $\pm$ 0.108 | 0.523 $\pm$ 0.176 |
| Meat       | beef            | 2           | 0.207 $\pm$ 0.050 | 1.804 $\pm$ 0.004 | 0.146 $\pm$ 0.022 | N.D               |
|            | chicken         | 4           | 0.117 $\pm$ 0.027 | 0.126 $\pm$ 0.088 | 0.126 $\pm$ 0.024 | N.D               |
|            | mutton          | 2           | 0.122 $\pm$ 0.002 | 2.034 $\pm$ 0.202 | 0.093 $\pm$ 0.027 | N.D               |
|            | pork            | 5           | 0.109 $\pm$ 0.032 | 0.068 $\pm$ 0.143 | 0.149 $\pm$ 0.059 | N.D               |
| Eggs       | eggs            | 6           | 0.125 $\pm$ 0.062 | 0.303 $\pm$ 0.118 | N.D               | N.D               |
| Milk       | milk            | 6           | 0.281 $\pm$ 0.061 | 1.686 $\pm$ 0.929 | 0.155 $\pm$ 0.148 | 0.126 $\pm$ 0.020 |
| Oil        | oil             | 14          | 1.495 $\pm$ 0.930 | 1.617 $\pm$ 2.441 | 2.027 $\pm$ 0.954 | 2.623 $\pm$ 2.210 |

Note: 1) ND - not detectable; 2) For those without replicates due to technical reason (lost during analysis or outliers of individual isomers), standard deviations were not available; 3) The same brands of oil from same producers (Fulinmen and Luhua) were the most popular products in the market of both cities and the samples were combined for analysis.



**Table S8.** Daily dietary intakes (means, standard deviations and medians) of HCHs by the mothers from Beijing and Shenyang, ng/kg·day.

| Population |         | $\alpha$ -HCH | $\beta$ -HCH | $\gamma$ -HCH | $\delta$ -HCH | $\Sigma$ -HCH |
|------------|---------|---------------|--------------|---------------|---------------|---------------|
| Beijing    | mean±SD | 2.58 ± 1.00   | 5.90 ± 3.65  | 2.99 ± 1.42   | 1.89 ± 0.63   | 13.4 ± 6.0    |
|            | n=40    |               |              |               |               |               |
| Shenyang   | M       | 2.32          | 4.68         | 2.77          | 1.69          | 10.9          |
|            | n=36    |               |              |               |               |               |
| Shenyang   | mean±SD | 3.62 ± 1.21   | 6.10 ± 2.07  | 1.55 ± 0.410  | 1.35 ± 0.350  | 12.6 ± 3.70   |
|            | M       | 3.60          | 6.60         | 1.47          | 1.28          | 13.0          |

**Regression statistics for the linear model.** The ln-transformed human milk  $\Sigma$ HCH of the two populations could be predicted based on simple linear model using the dietary intakes as the independent variable. The regression statistics are listed in Table S9.

**Table S9.** Regression statistics for the linear regression model for predicting human milk  $\Sigma$ HCH.

| Population | Intercept | S.E. of Intercept | Slope | S.E. of Slope | p of Intercept | p of slope |
|------------|-----------|-------------------|-------|---------------|----------------|------------|
| Beijing    | 4.12      | 0.193             | 0.049 | 0.0071        | 5.15E-22       | 6.89E-8    |
| Shenyang   | 3.77      | 0.311             | 0.150 | 0.0237        | 6.90E-14       | 3.34E-7    |

**Prediction of HCHs in the human milk.** It was found that a non-linear model can predict the levels of HCHs in the human milk well. Both BMI and the dietary intake were used as the independent variables. The empirical models derived are as follows:

$$C_m (\text{human milk}) = 2.10 \times 10^{-5} I_d^{4.58} + 5.73 \text{ BWI} - 2.55 \quad (\text{Beijing}) \quad R^2 = 0.89,$$

$$C_m (\text{human milk}) = 2.4 I_d^{1.9} + 26.5 \text{ BWI} - 735.8 \quad (\text{Shenyang}) \quad R^2 = 0.58,$$

where  $C_m$  and  $I_d$  were the residuals of HCHs in the human milk and the dietary intake, respectively. Due to the ill conditioned matrix, the standard errors could not be calculated.

**The results of the Monte Carlo simulation on the breastfed risk.** The result is presented in Figure S1 as cumulative frequencies of daily intakes of HCHs by breastfed infants. Normal distributions of body weight and milk consumption and log-normally distributed concentrations of  $\beta$ -HCH were assumed. The average diet of breastfed infants was set at  $800 \pm 160$  g milk per day (2).

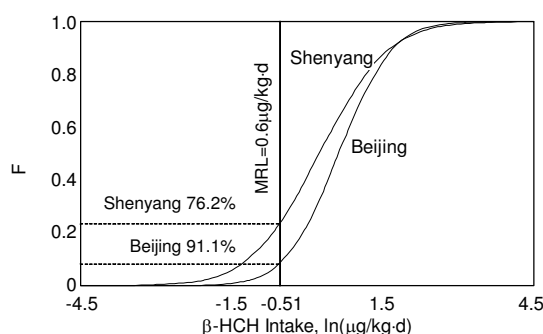

**Figure S1.** Cumulative frequencies of the estimated daily intake of  $\beta$ -HCH by infant through breast feeding over a range from  $-4.5 \ln(\mu\text{g/kg-day})$  to  $4.5 \ln(\mu\text{g/kg-day})$  for Beijing and Shenyang, respectively. The results were derived from a Monte Carlo simulation using the data collected from Beijing and Shenyang during a period of 2005-2007. The results were assessed based on Minimal Risk Level (MRL) of  $0.6 \mu\text{g/kg-day}$  issued by US Agency for Toxic Substances and Disease Registry.

## References

- (1) Zhai, F. Y.; Yang, X. G. 2006. Report on Nutrient and Health of Chinese Population in 2002, II Diet Pattern and Nutrient Intake. Beijing: People's Health Press.
- (2) Xing, Y.; Zai, Z. How much you know about breast feeding. available: 2008, [http://blog.sina.com.cn/s/blog\\_4a7bafdd010090i7.html](http://blog.sina.com.cn/s/blog_4a7bafdd010090i7.html) (Accessed April 28, 2008).
